# Supplementary material for: Influence of serum transferrin concentration on diagnostic criteria for iron deficiency in chronic heart failure
Source: PubMed Central journal article supplement — ESC Heart Fail. 2023 Jul 3;10(5):2826–36. doi: 10.1002/ehf2.14438 (PMC10567655; doi:10.1002/ehf2.14438), 2023-07-03
Supplement: EHF2-10-2826-s001.pdf [file EHF2-10-2826-s001.pdf]

Figure S1

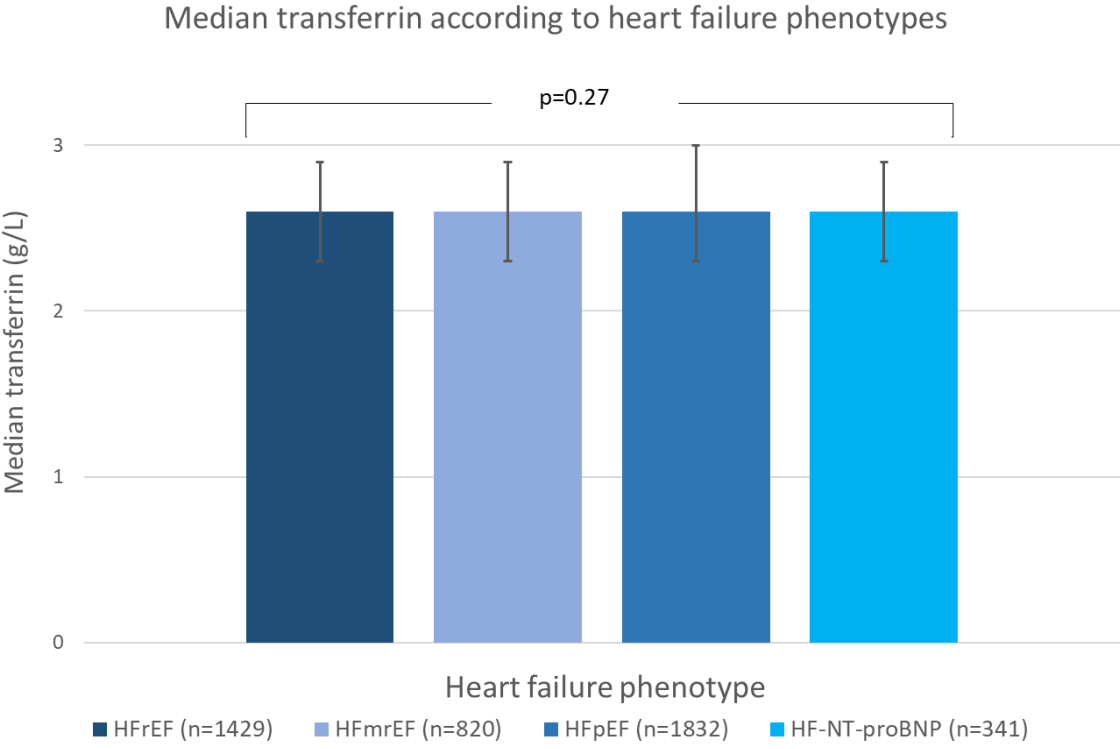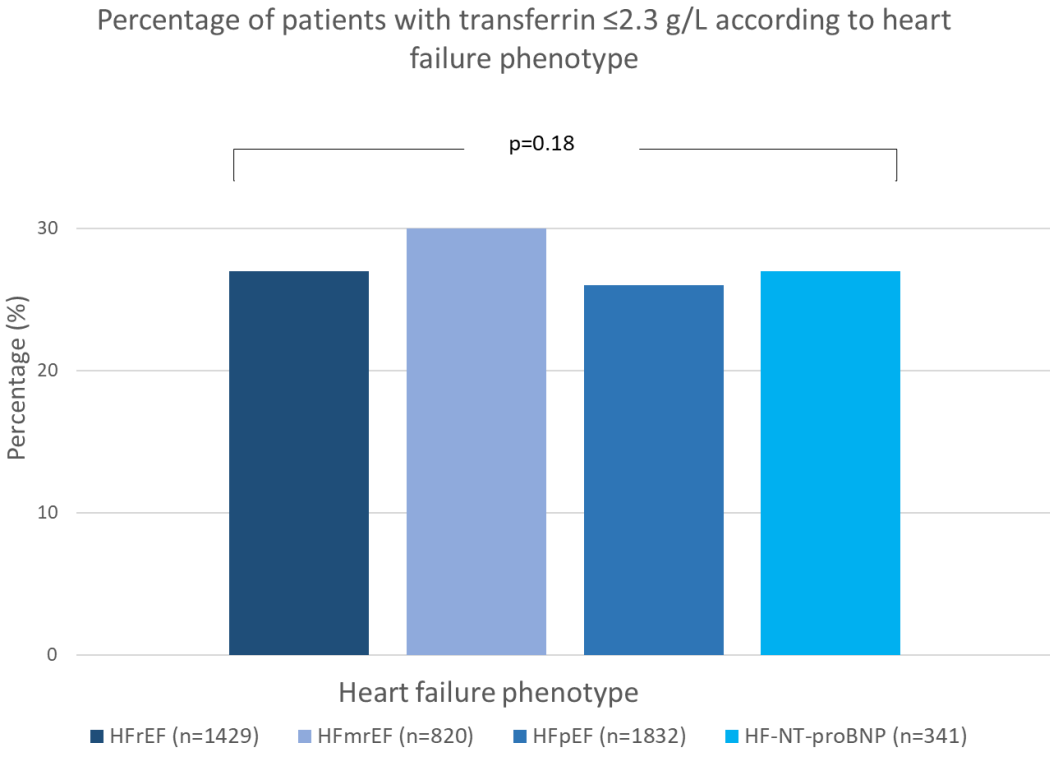

Figure S2

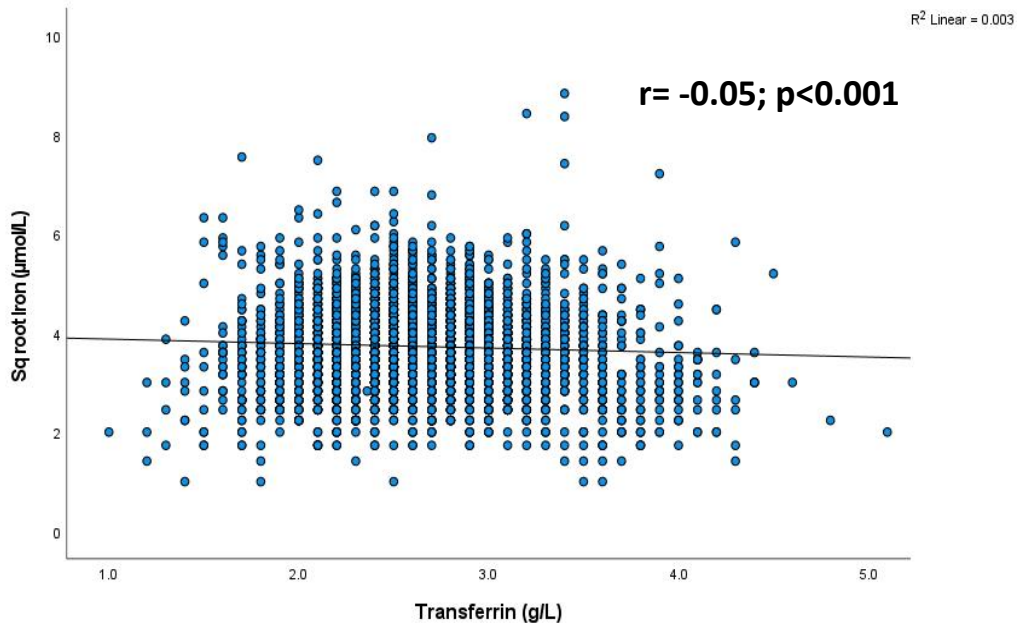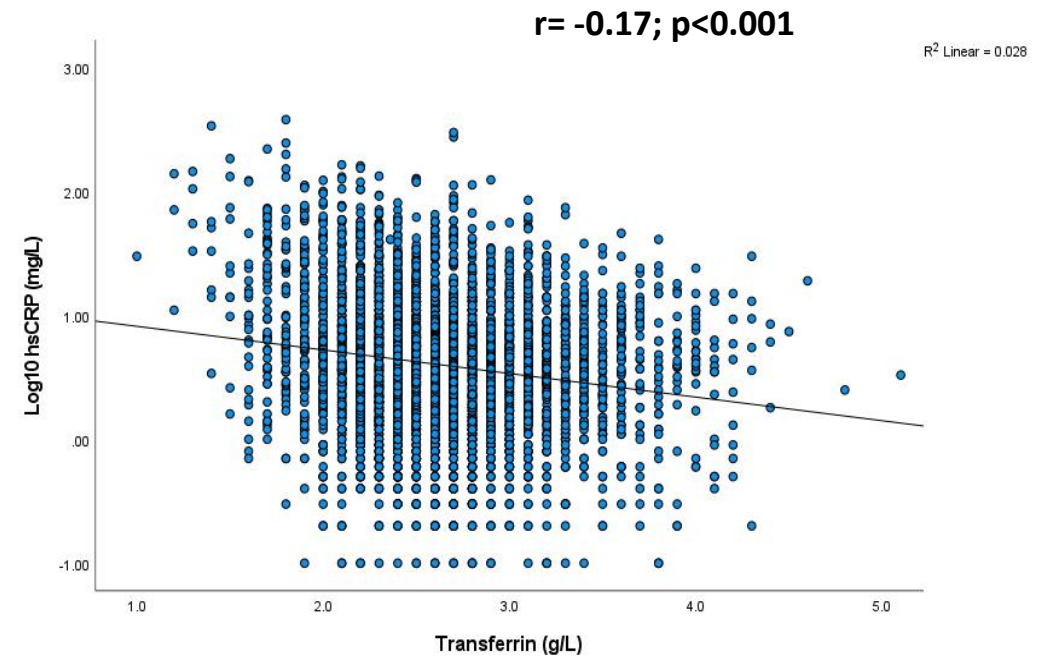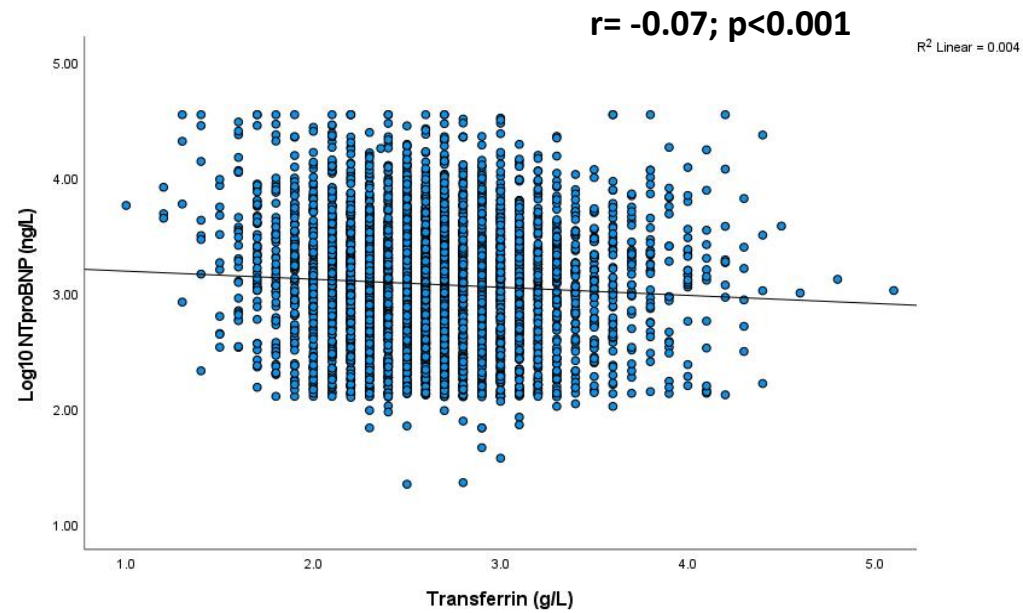

Figure S2

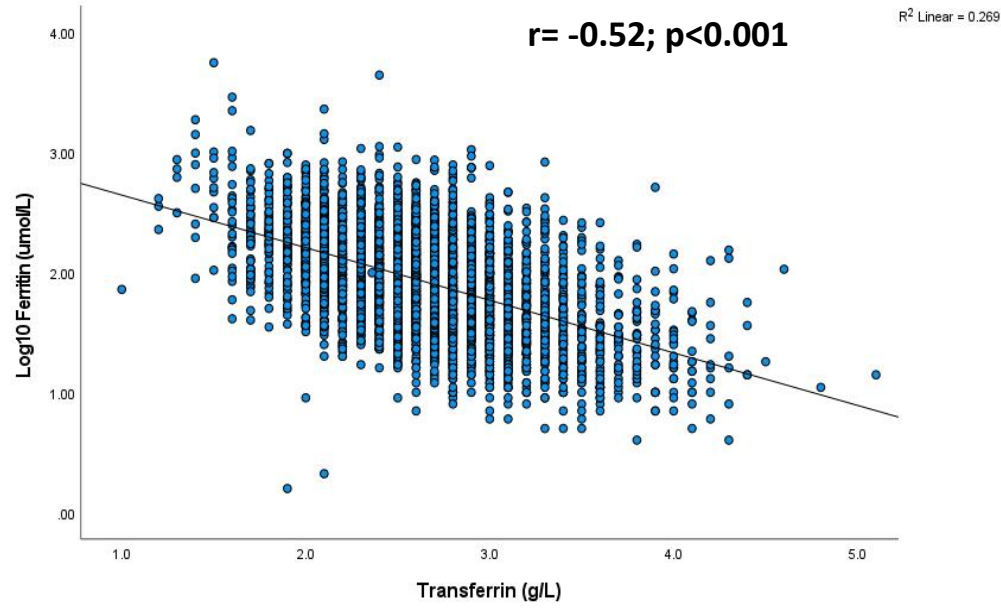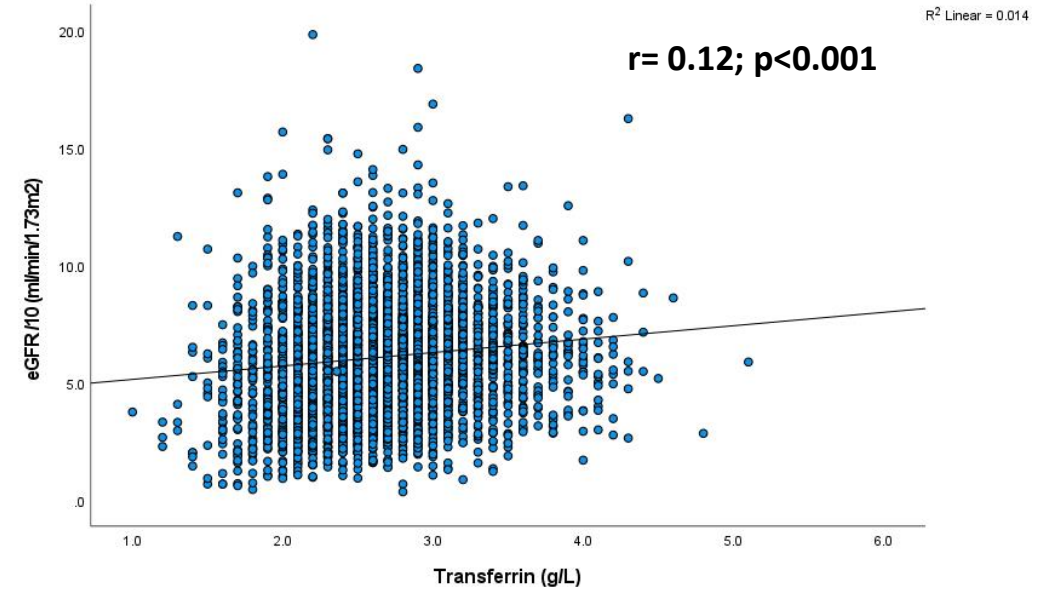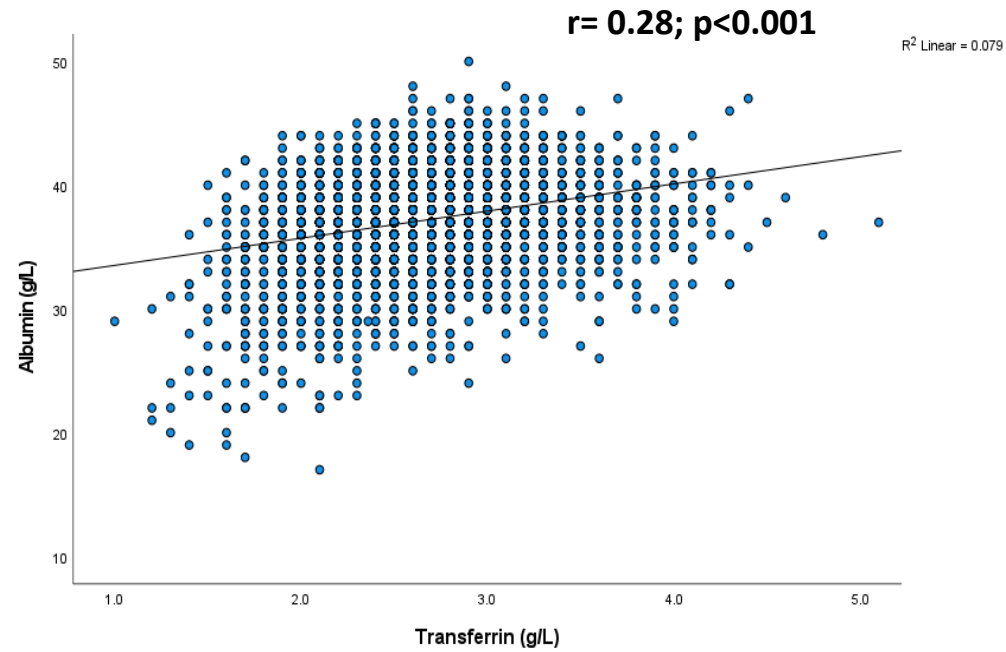

Figure S3a

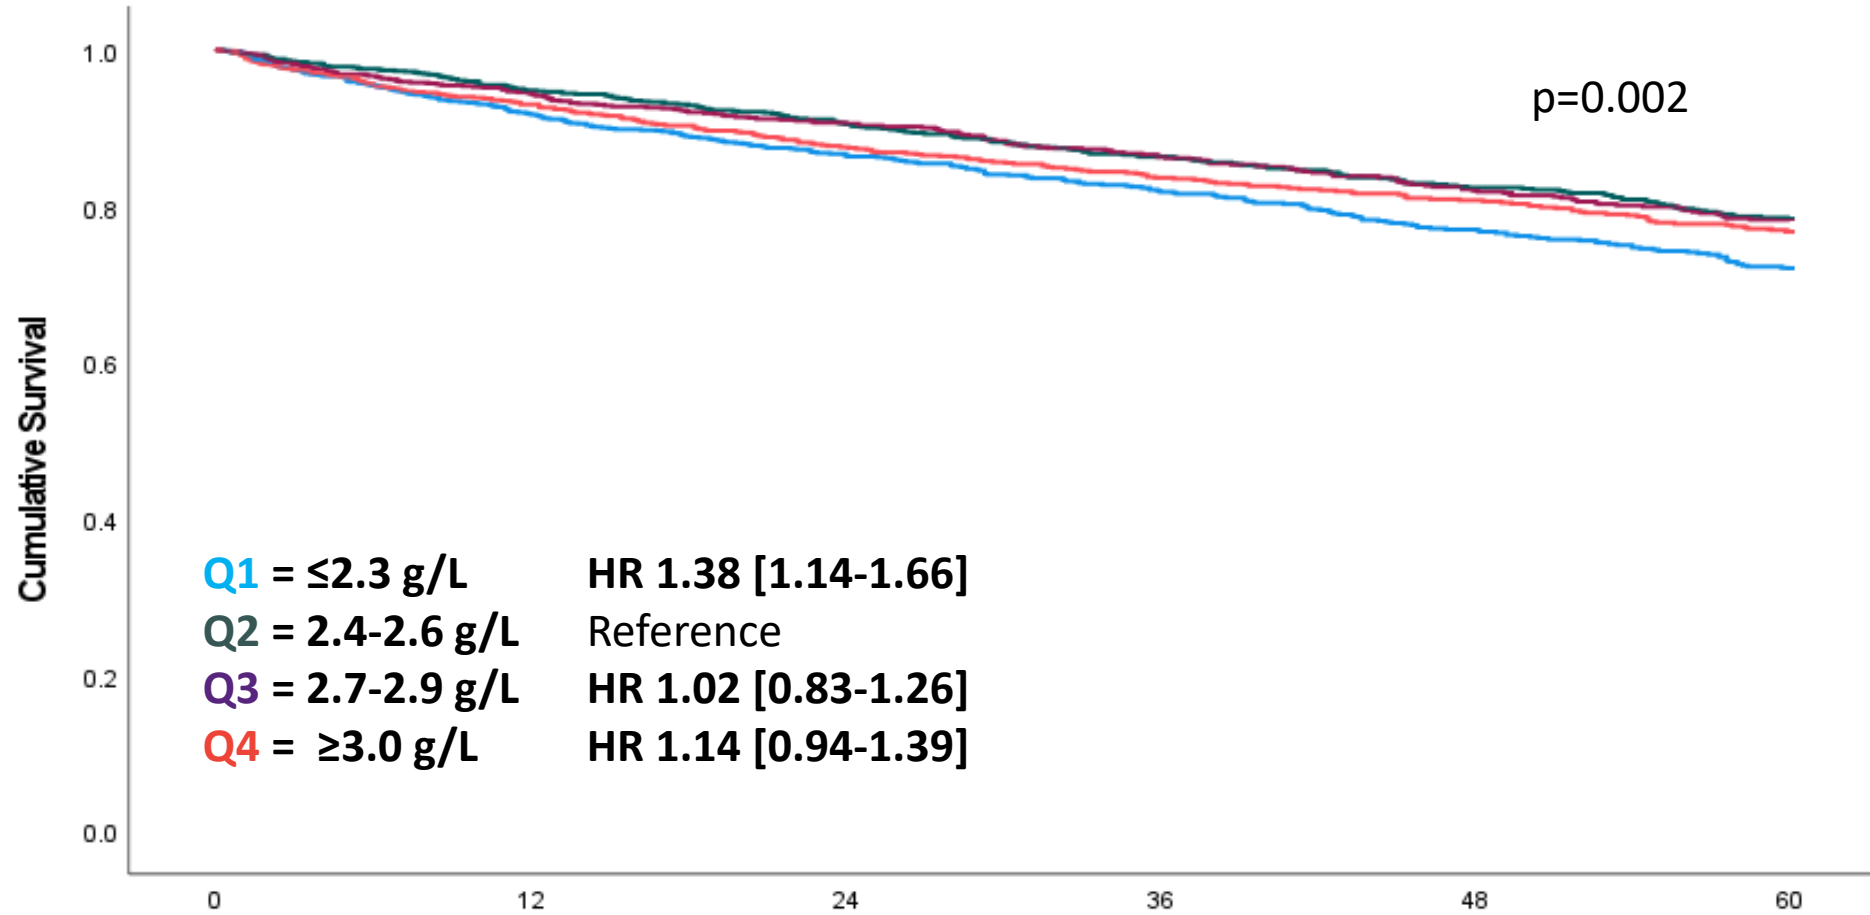

Number at risk

|                      | 0    | 12  | 24  | 36  | 48  | 60  |
|----------------------|------|-----|-----|-----|-----|-----|
| Q1 ( $\leq 2.3$ g/L) | 1195 | 944 | 783 | 641 | 552 | 452 |
| Q2 (2.4-2.6g/L)      | 1159 | 968 | 836 | 708 | 618 | 525 |
| Q3 (2.7-2.9g/L)      | 1003 | 831 | 717 | 616 | 528 | 453 |
| Q4 ( $\geq 3.0$ g/L) | 1065 | 872 | 747 | 643 | 563 | 469 |

**Figure S3b**

Analysis of patients only in the lowest quartile ( $\leq 2.3$  g/L) of serum transferrin concentration

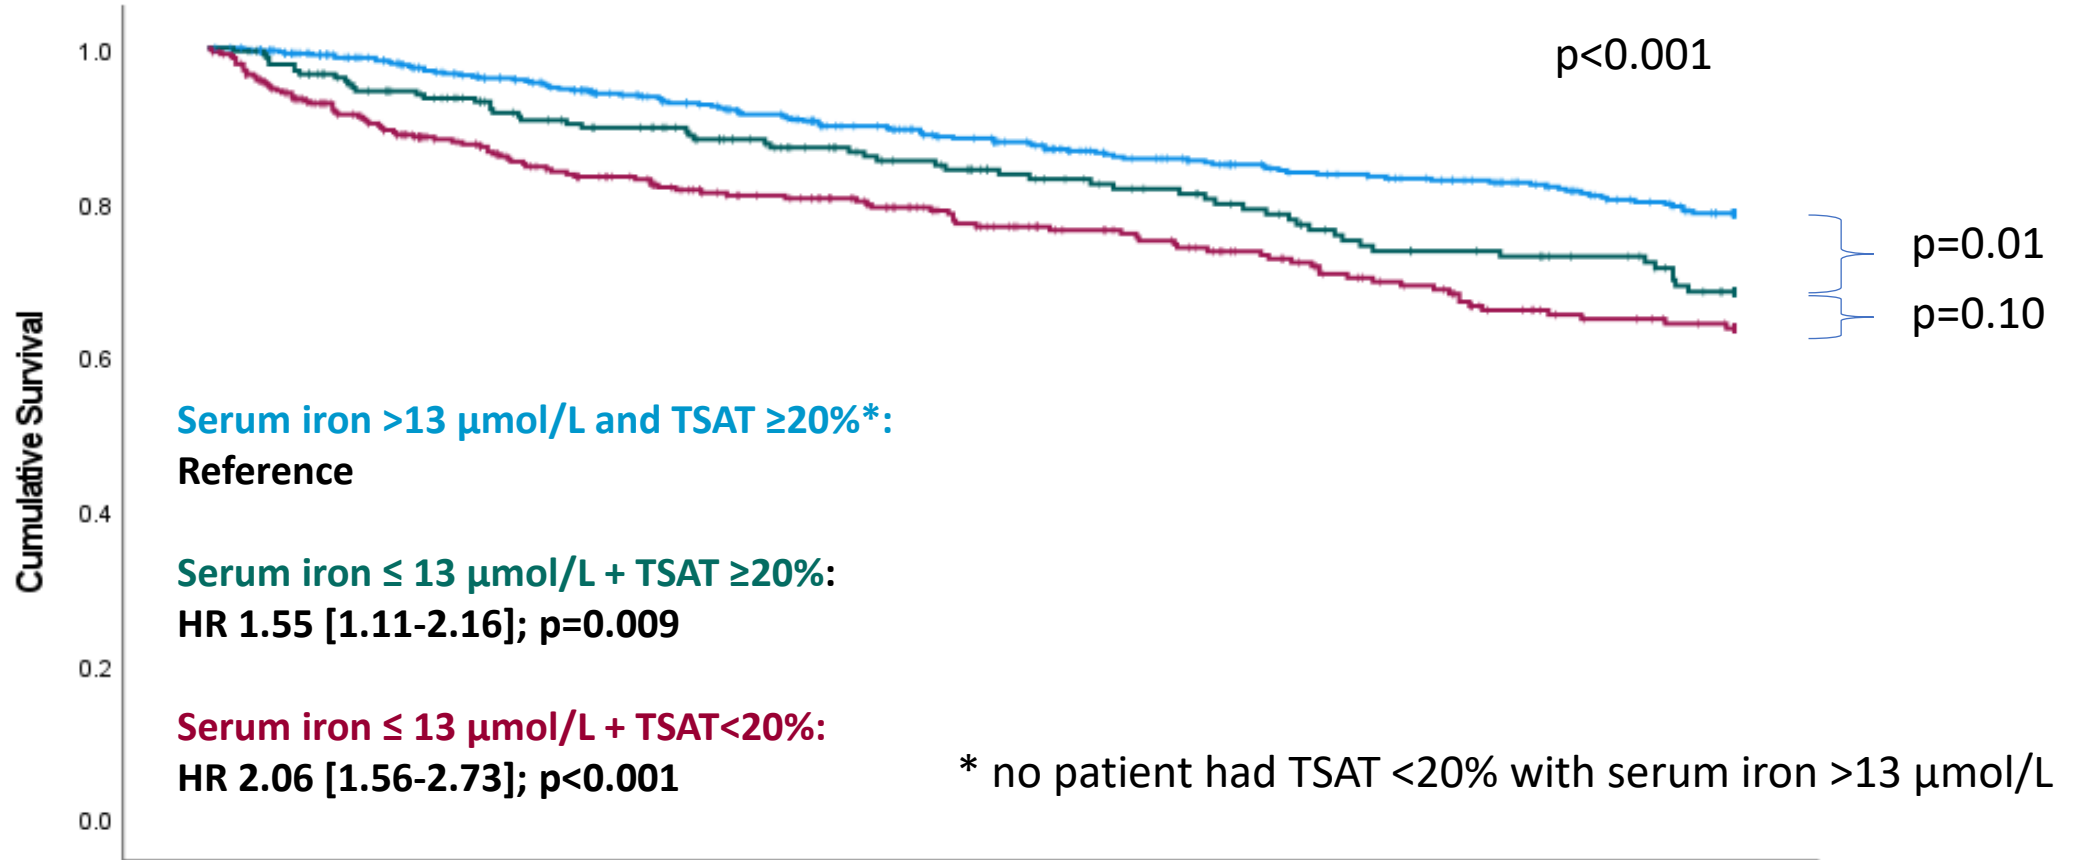

Number at risk

|                              | 0   | 12  | 24  | 36  | 48  | 60  |
|------------------------------|-----|-----|-----|-----|-----|-----|
| Low Tf alone                 | 571 | 490 | 412 | 317 | 313 | 263 |
| + low SIC + TSAT $\geq 20\%$ | 239 | 191 | 157 | 128 | 105 | 85  |
| + low SIC + TSAT $< 20\%$    | 385 | 263 | 214 | 166 | 134 | 104 |

Figure S4a

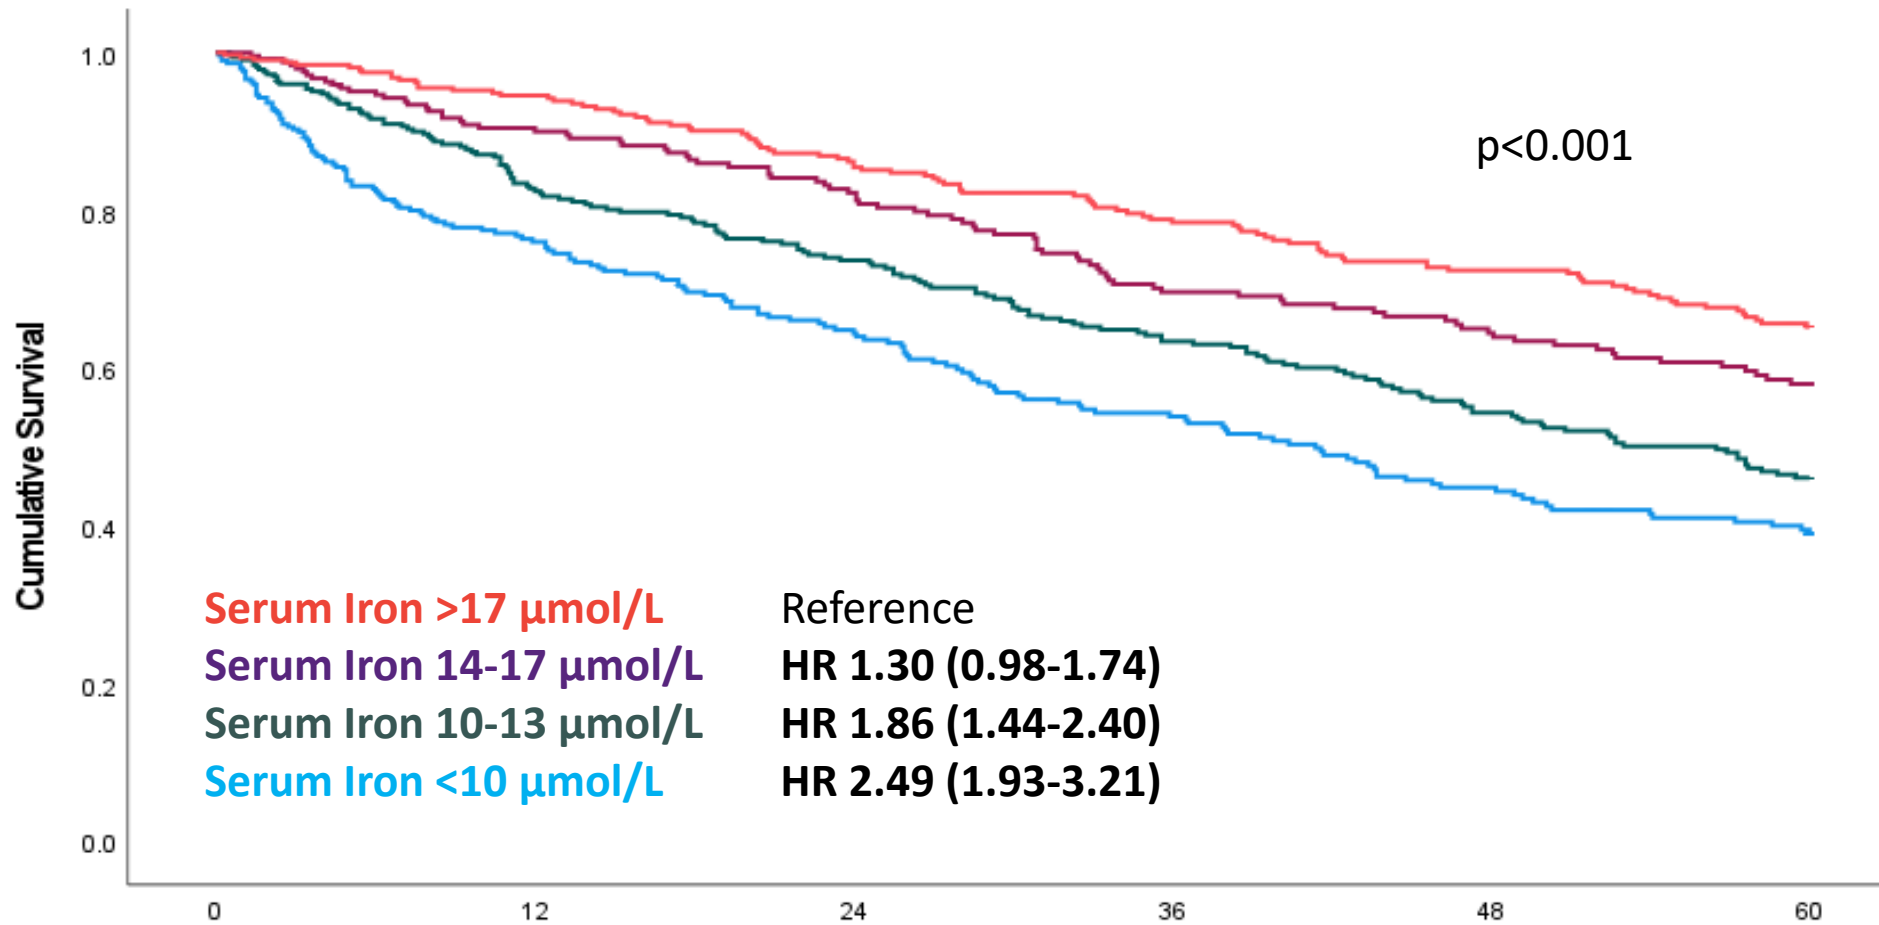

Number at risk

|                 | 0   | 12  | 24  | 36  | 48  | 60  |
|-----------------|-----|-----|-----|-----|-----|-----|
| Serum SIC >17   | 324 | 283 | 241 | 209 | 189 | 159 |
| Serum SIC 14-17 | 247 | 207 | 172 | 139 | 124 | 104 |
| Serum SIC 10-13 | 326 | 249 | 213 | 172 | 142 | 112 |
| Serum SIC <10   | 298 | 206 | 157 | 122 | 97  | 76  |

Figure S4b

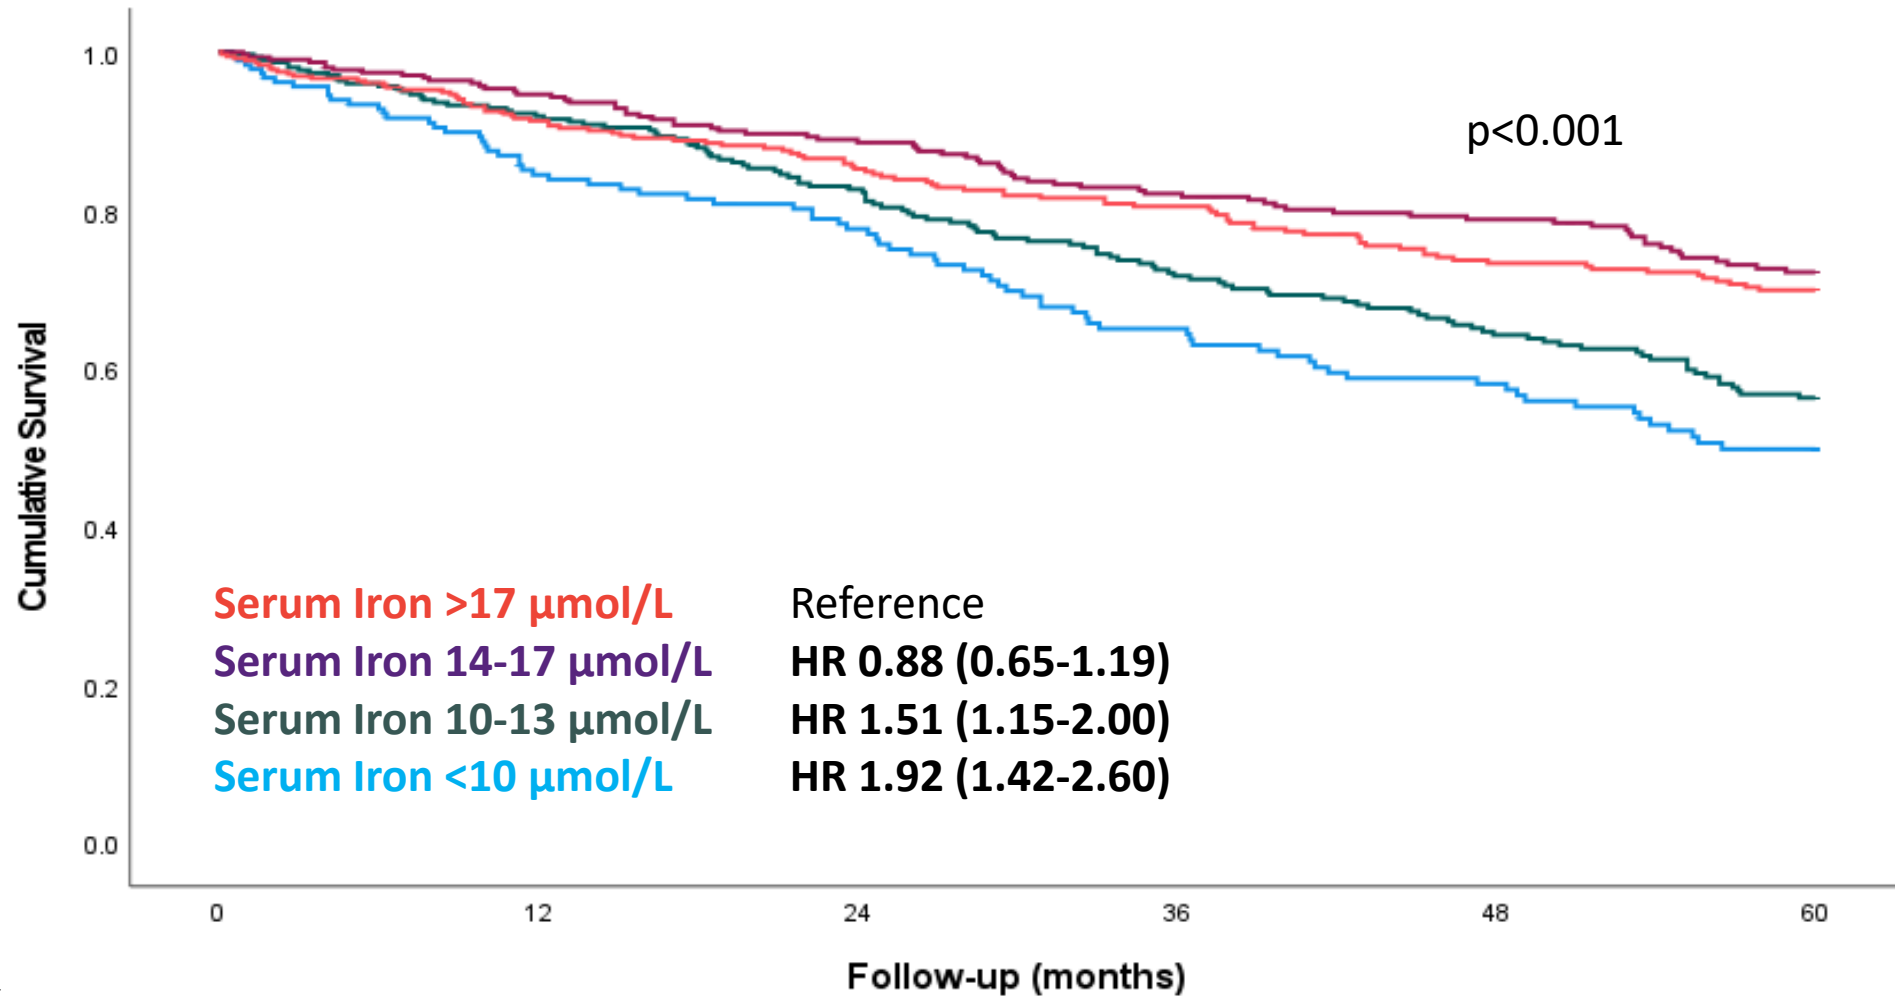

Number at risk

|                 | 0   | 12  | 24  | 36  | 48  | 60  |
|-----------------|-----|-----|-----|-----|-----|-----|
| Serum SIC >17   | 360 | 298 | 258 | 228 | 200 | 181 |
| Serum SIC 14-17 | 311 | 270 | 242 | 207 | 185 | 157 |
| Serum SIC 10-13 | 305 | 261 | 216 | 179 | 151 | 125 |
| Serum SIC <10   | 183 | 139 | 120 | 94  | 82  | 62  |

Figure S4c

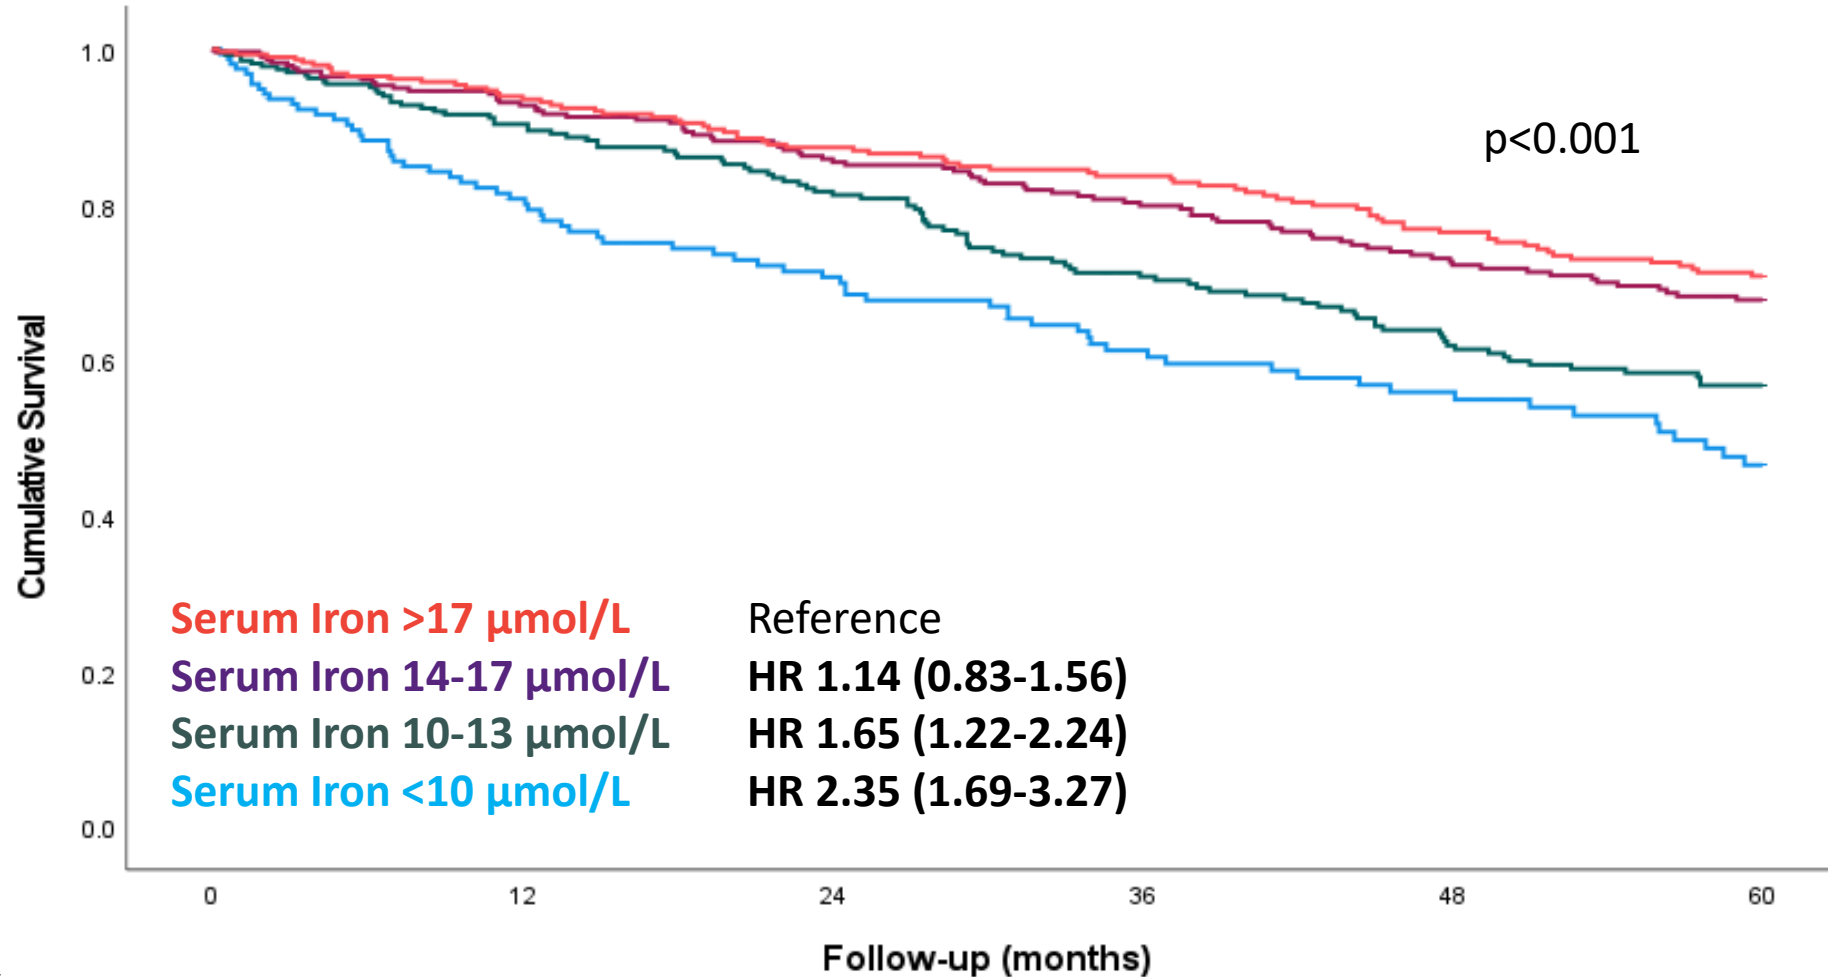

Number at risk

|                 | 0   | 12  | 24  | 36  | 48  | 60  |
|-----------------|-----|-----|-----|-----|-----|-----|
| Serum SIC >17   | 294 | 249 | 219 | 200 | 177 | 158 |
| Serum SIC 14-17 | 286 | 250 | 220 | 195 | 167 | 148 |
| Serum SIC 10-13 | 267 | 217 | 184 | 149 | 124 | 105 |
| Serum SIC <10   | 156 | 115 | 95  | 72  | 59  | 43  |



Figure S4d

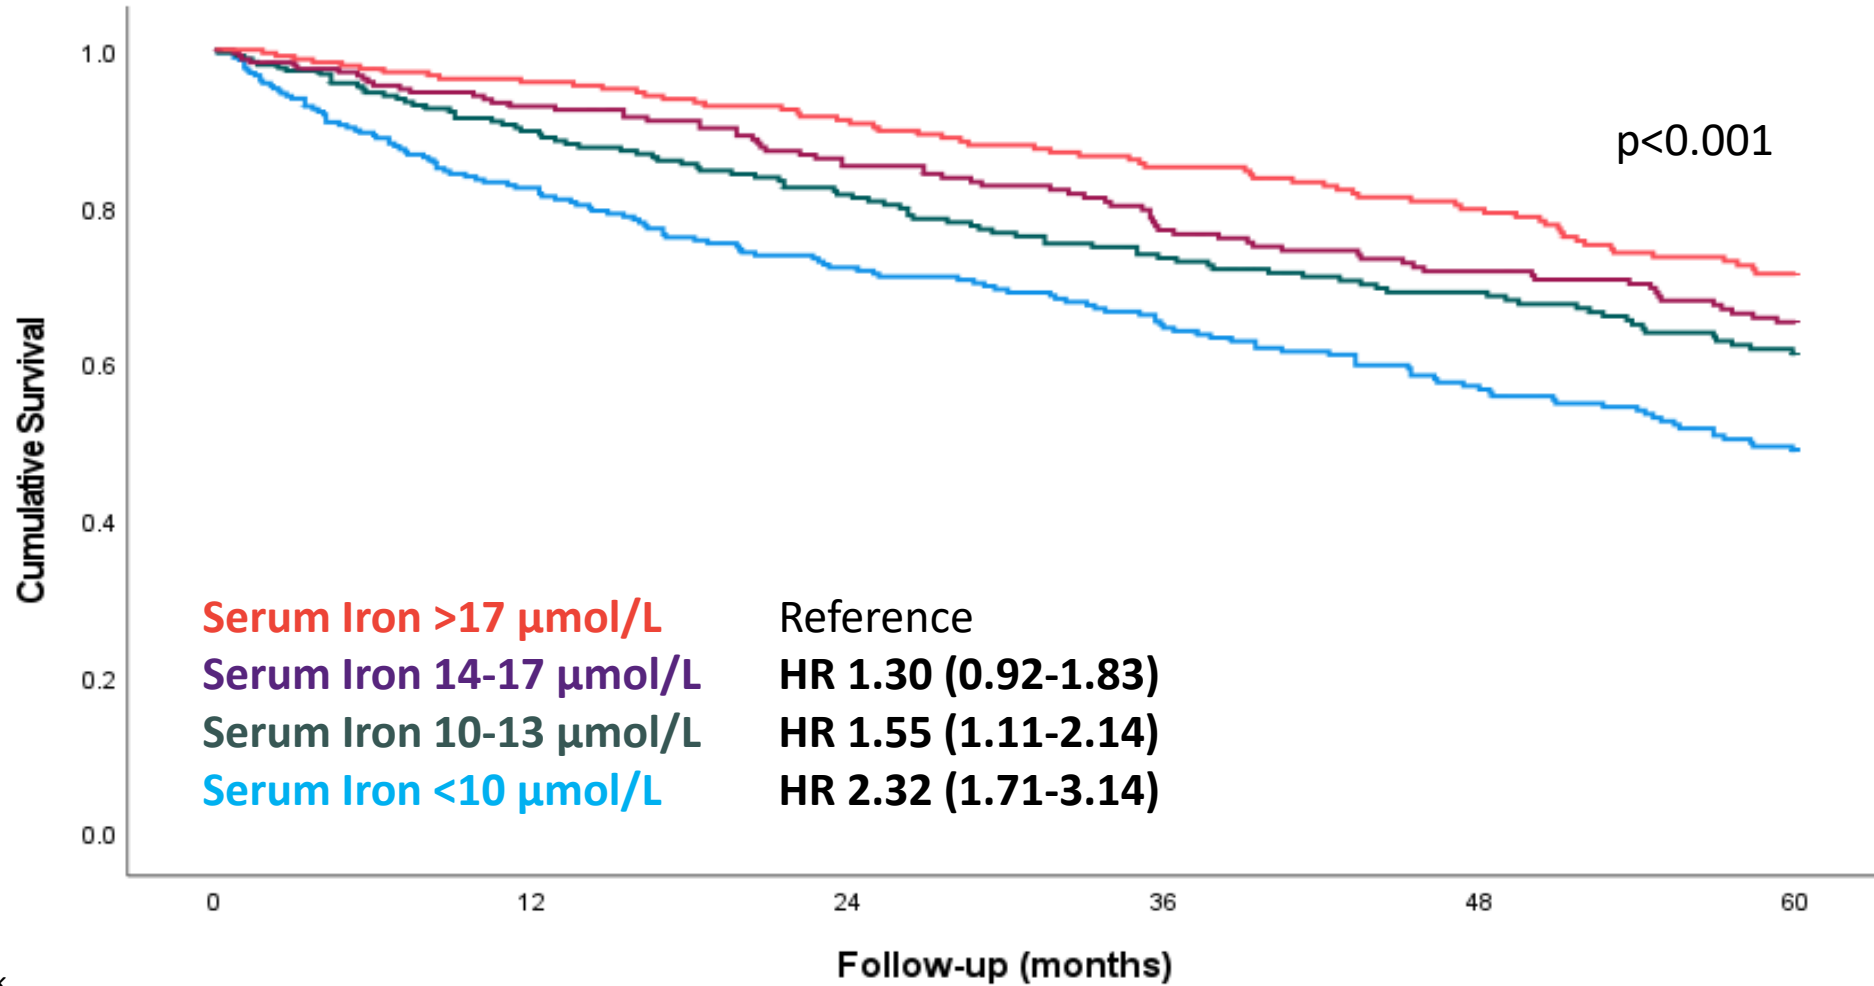

Number at risk

|                 | 0   | 12  | 24  | 36  | 48  | 60  |
|-----------------|-----|-----|-----|-----|-----|-----|
| Serum SIC >17   | 250 | 225 | 202 | 181 | 160 | 133 |
| Serum SIC 14-17 | 249 | 205 | 174 | 149 | 135 | 119 |
| Serum SIC 10-13 | 261 | 215 | 185 | 158 | 139 | 113 |
| Serum SIC <10   | 305 | 227 | 186 | 156 | 129 | 105 |
